# Supplementary material for: Thermally boosted upconversion and downshifting luminescence in Sc2(MoO4)3:Yb/Er with two-dimensional negative thermal expansion
Source: Research Square preprint supplement (doi:10.21203/rs.3.rs-952130/v1), 2021-10-13
Supplement: Supplementary file 1 [file 0a7f2ba15f4d2135dd489072.docx]

**Supplementary Table S1|.** Representative optical ratiometric thermometry methods with emission bands lying within the NIR biological window.

| Materials | T Range (K) | *Sr* (%/ K) | Mode ( nm) | Ref. |
| --- | --- | --- | --- | --- |
| Sc2(MoO4)3:Yb3+/Er3+ | 298-623 | 12.9 | Lifetime1538 | This work |
| LiLaP4O12:Yb3+/Cr3+ | 100-475 | 1.2 | FIR820/975 | 1 |
| LiLaP4O12:Nd3+/Cr3+ | 293-323 | 4.89 | FIR810/1048 | 2 |
| LaF3:Tm3+ | 297-361 | 1.90 | FIR1470/1230 | 3 |
| LuVO4:Yb3+/Er3+@SiO2 | 298-523 | 0.182 | FIR1469/1527 | 45 |
| TTA-NaYF4: Nd3+ | 283-323 | 7.1 | FIR540/1060 | 4 |
| Al4B2O9:Yb3+/Nd3+ | 298-333 | 2.6 | FIR800/920 | 5 |
| LaF3:Yb3+/Er3+@LaF3:Yb3+/Tm3+ | 293-323 | 5 | FIR1000/1550 | 46 |
| YVO4:Yb3+/Tm3+ | 300-1009 | 2.13 | FIR940/800 | 6 |
| YAlO3:Nd3+ | 293-611 | 1.83 | FIR820/890 | 7 |
| Na2K(Lu3Si6O18):Yb3+/Er3+ | 12-450 | 2.6 | FIR1125/1640 | 8 |

**
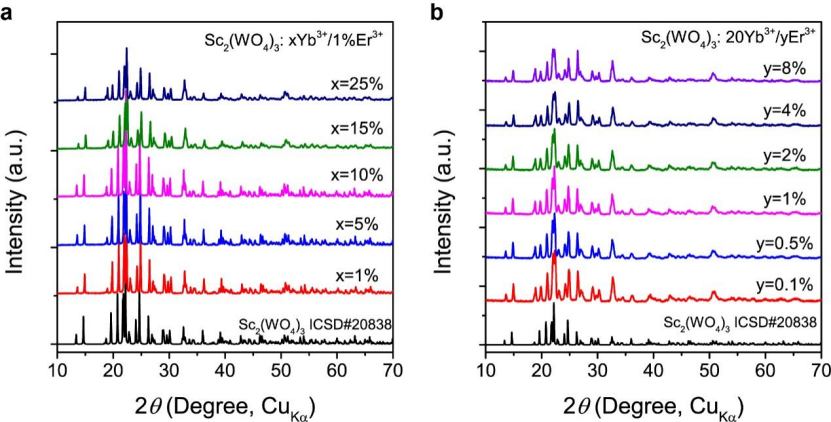
**

**Supplementary Figure 1| Structural characterization.** **a.** XRD patterns of Sc2(MoO4)3:xYb/1%Er crystals with different Yb3+ doped concentrations at room temperature. **b.** XRD patterns of Sc2(MoO4)3:20%Yb/yEr crystals with different Er3+ doped concentrations at room temperature.

**
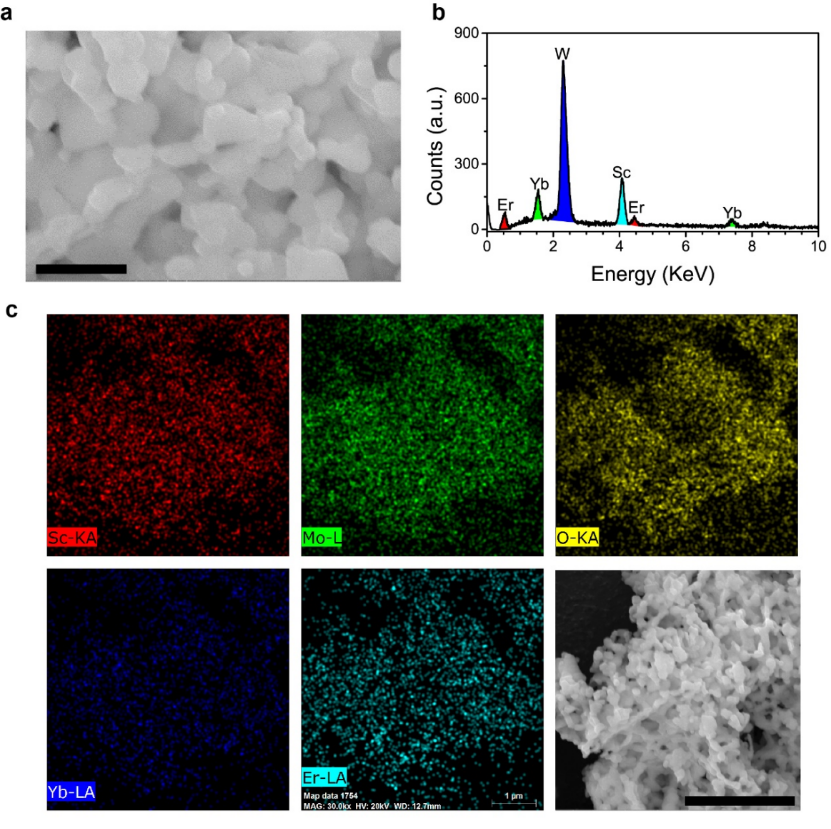
**

**Supplementary Figure 2| Morphology and chemical compositions. a.** Typical SEM images of the Sc2(MoO4)3:20%Yb/1%Er phosphors. The scale bar is 1 μm. **b.** EDX data taken from a single particle. **c.** Elemental maps of Sc, Mo, O, Yb and Er in Sc2(MoO4)3:20%Yb/1%Er particle. The scale bar is 5 μm.

**
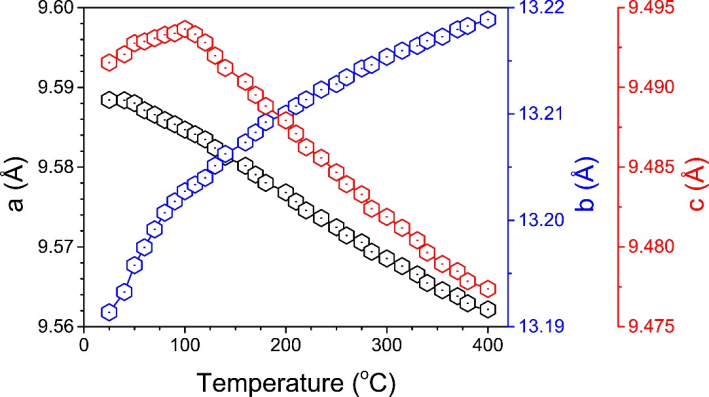
**

**Supplementary Figure 3| Lattice changes with temperature.** Temperature-dependent unit cell parameters a, b, and c of the Sc2(MoO4)3:20%Yb/1%Er phosphors derived from *in situ* SXRD patterns.

**
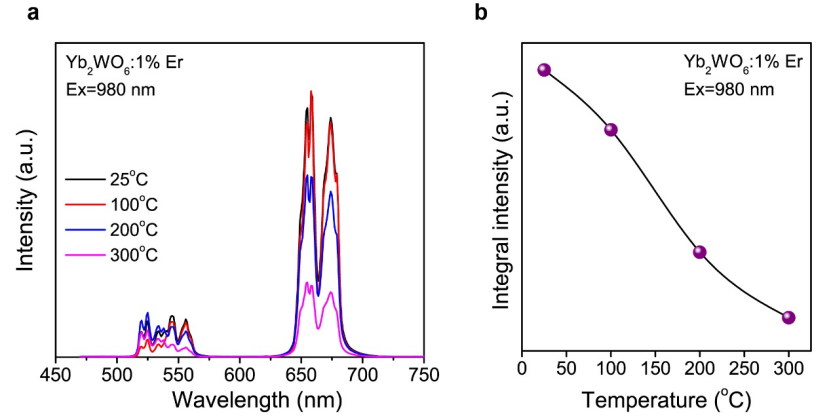
**

**Supplementary Figure 4| Emission spectra in Yb2WO6:1%Er3+ phosphor. a.** Upconversion emission spectra of the Yb2WO6:1%Er3+ crystals as a function of temperature under 980 nm excitation. **b.** Integral emission intensity of Yb2WO6: 1%Er3+ crystals as a function of temperature.

**
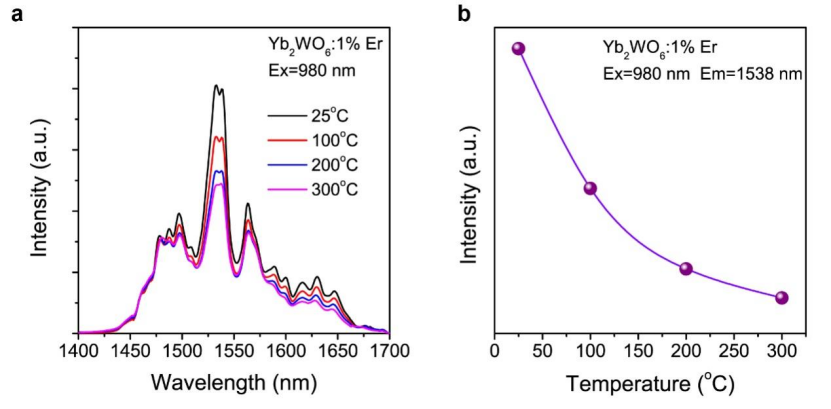
**

**Supplementary Figure 5| Spectra in Yb2WO6:1%Er phosphor. a.** Downshifting emission spectra of Yb2WO6:1%Er. **b.** Integral emission intensity of Yb2WO6:1%Er crystals as a function of temperature.

**
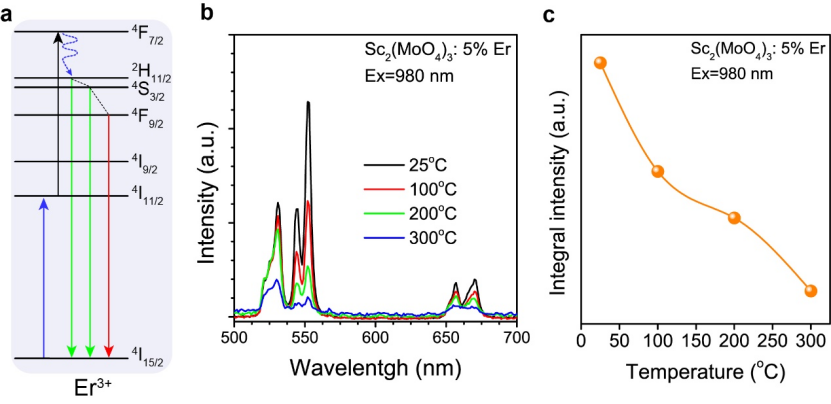
**

**Supplementary Figure 6| Emission spectra in Sc2(MoO4)3:5%Er3+ phosphor. a.** Simplified energy level diagram showing upconversion process via excited-state absorption of Er3**+**. **b.** Upconversion emission spectra of the Sc2(MoO4)3:5%Er3+ crystals as a function of temperature under 980 nm excitation. **c.** Integral emission intensity of Sc2(MoO4)3:5%Er3+ crystals as a function of temperature.

**
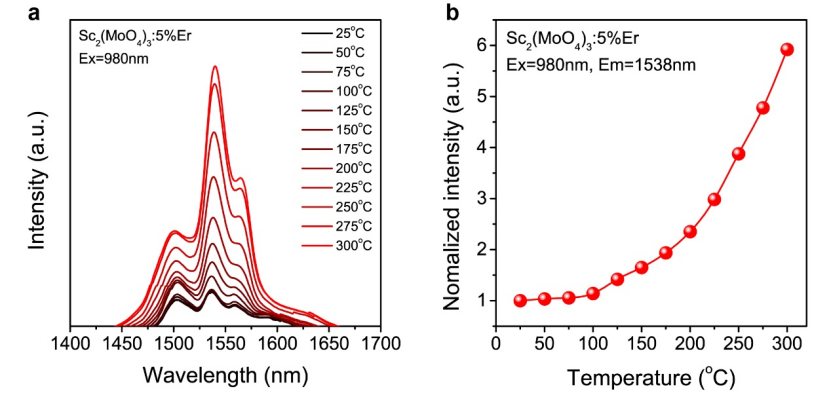
**

**Supplementary Figure 7| Temperature-dependent spectra in Sc2(MoO4)3:5%Er phosphor. a.** Downshifting emission spectra of Sc2(MoO4)3:5%Er under 980 nm excitation. **b** Normalized NIR emission intensities of Sc2(MoO4)3:5%Er3+as a function of temperature.

**
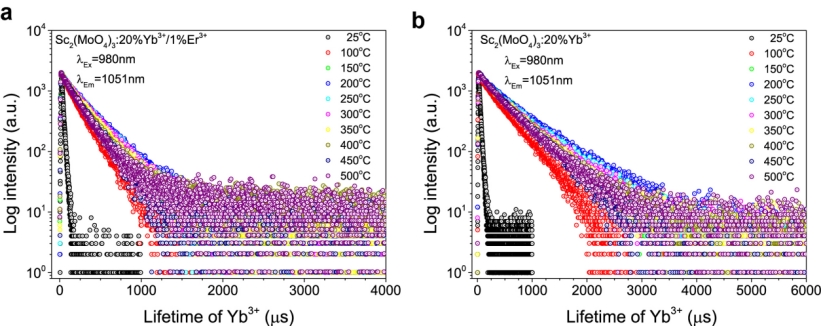
**

**Supplementary Figure 8| Temperature-dependent luminescence decay curves of 2F5/2 excited state of Yb3+. a.** and **b.** Temperature-dependent luminescence decay curves of 2F5/2 excited state of Yb3+ in Yb3+/Er3+-codoped and Yb3+-single doped SMO, respectively.

**
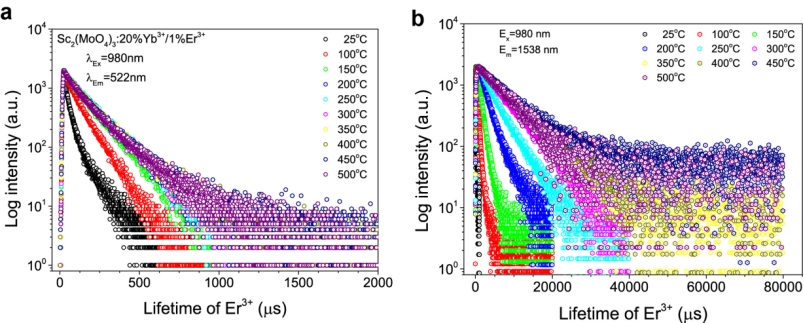
**

**Supplementary Figure 9| Temperature-dependent luminescence decay curves of 2H11/2 and4I11/2 excited states of Er3+. a.** and **b.** Temperature-dependent luminescence decay curves of 2H11/2 and4I11/2excited states of Er3+ in Yb3+/Er3+-codoped SMO, respectively.

**References**

1. Marciniak, L. et al. Nanocrystalline NIR-to-NIR luminescent thermometer based on Cr3+,Yb3+ emission, *Sens. Actuators, B,* **243**, 388-393 (2017).
2. Marciniak, L. et al. A new generation of highly sensitive luminescent thermometers operating in the optical window of biological tissues, *J. Mater. Chem. C*, **4**, 5559-5563 (2016).
3. Ximendes, E. C. et al. Thulium doped LaF3 for nanothermometry operating over 1000 nm, *Nanoscale,* **11**, 8864-8869 (2019).
4. Xu, M. et al. Ratiometric nanothermometer in vivo based on triplet sensitized upconversion, *Nat. Commun*. **9**, 2698 (2018).
5. Silva, A. F. et al. Thermal sensitivity of frequency upconversion in Al4B2O9:Yb3+/Nd3+ nanoparticles, *J. Mater. Chem. C*, **5**, 1240-1246 (2017).
6. Runowski, M. et al. Luminescent nanothermometer operating at very high yemperature-sensing up to 1000 K with upconverting nanoparticles (Yb3+/Tm3+), ACS Appl. Mater. Interf. **12**, 43933-43941 (2020)
7. Hernandez-Rodríguez, M. A. et al. Comparison of the sensitivity as optical temperature sensor of nano-perovskite doped with Nd3+ ions in the first and second biological windows. *Sens. Actuators, B* **255**, 970-976 (2018).
8. Ananias, D. et al. Near-infrared ratiometric Luminescent thermometer based on a new lanthanide silicate, *Chem. Eur. J*., **24**, 11926-11935 (2018).
